# Supplementary material
Source: Springer Nature journal article supplement (https://www.springermedizin.de/resource/supplementary/12968_2009_960_MOESM5_ESM.pdf/9580050)
Supplement: MOESM5 [file 9580050]

## Negative LR (95% CI)

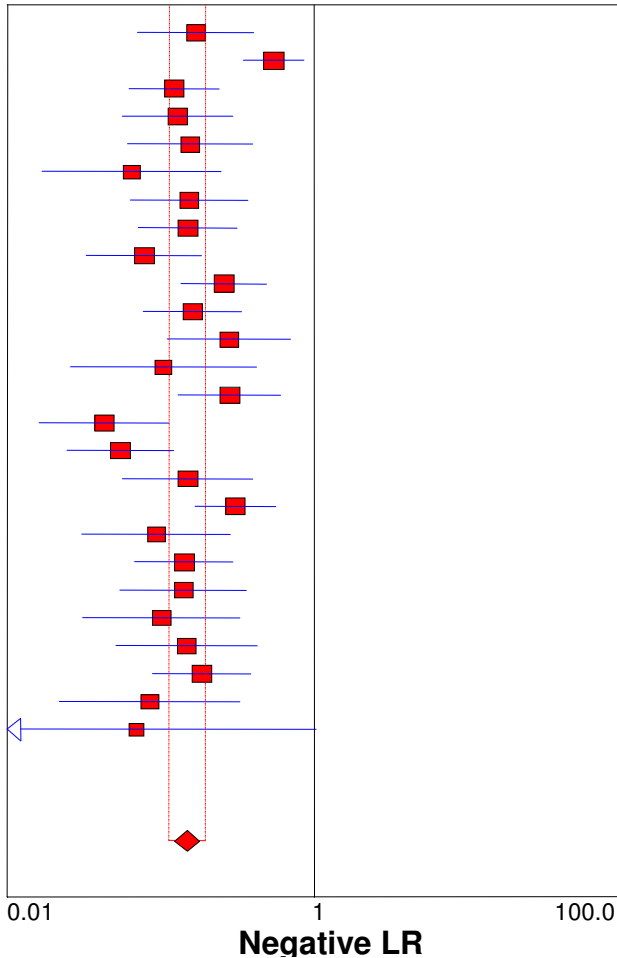

|                    |      |               |
|--------------------|------|---------------|
| Schwitter (2001)   | 0.17 | (0.07 - 0.40) |
| Doyle (2003)       | 0.54 | (0.34 - 0.86) |
| Ishida (2003)      | 0.12 | (0.06 - 0.24) |
| Nagel (2003)       | 0.13 | (0.06 - 0.30) |
| Giang (2004)       | 0.16 | (0.06 - 0.40) |
| Kawase (2004)      | 0.06 | (0.02 - 0.25) |
| Paetsch (2004)     | 0.15 | (0.06 - 0.37) |
| Plein (2004)       | 0.15 | (0.07 - 0.31) |
| Takase (2004)      | 0.08 | (0.03 - 0.18) |
| Thiele (2004)      | 0.26 | (0.14 - 0.49) |
| Plein (2005)       | 0.16 | (0.08 - 0.34) |
| Sakuma (2005)      | 0.28 | (0.11 - 0.71) |
| Cury (2006)        | 0.10 | (0.03 - 0.42) |
| Klem (2006)        | 0.28 | (0.13 - 0.60) |
| Pilz (2006)        | 0.04 | (0.02 - 0.11) |
| Merkle (2007)      | 0.05 | (0.02 - 0.12) |
| Cheng (2007)       | 0.15 | (0.06 - 0.40) |
| Greenwood (2007)   | 0.31 | (0.17 - 0.56) |
| Seeger (2007)      | 0.09 | (0.03 - 0.28) |
| Gebker (2008)      | 0.14 | (0.07 - 0.29) |
| Meyer (2008)       | 0.14 | (0.05 - 0.36) |
| Pilz (2008)        | 0.10 | (0.03 - 0.33) |
| Klein (2008)       | 0.15 | (0.05 - 0.43) |
| Klem (2008)        | 0.18 | (0.09 - 0.39) |
| Thomas (2008)      | 0.08 | (0.02 - 0.32) |
| Burgstahler (2008) | 0.07 | (0.00 - 1.03) |

Random Effects Model

Pooled Negative LR = 0.15 (0.11 to 0.19)

Cochran-Q = 62.47; df = 25 (p = 0.0000)

Inconsistency (I-square) = 60.0 %

Tau-squared = 0.2723
